# Supplementary material
Source: PubMed Central journal article supplement (PMC2234197)

**A**

Fraction  
without  
Indentations

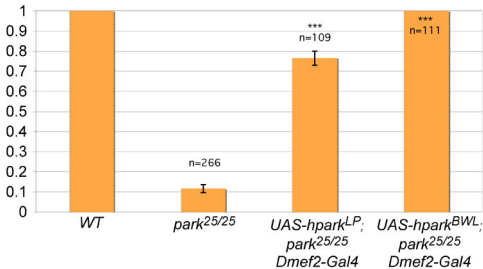**B**

Fraction  
without  
Indentations

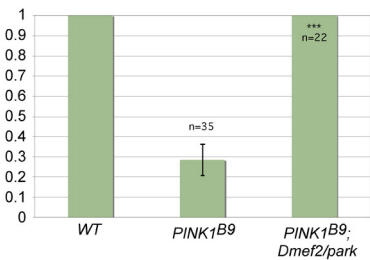**C**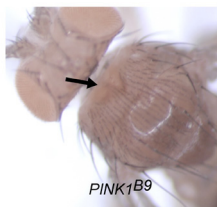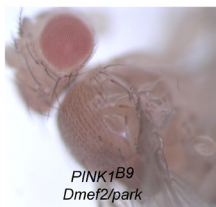

Supplement: pnas_0709336105_1.pdf [file pnas_0709336105_1.pdf]

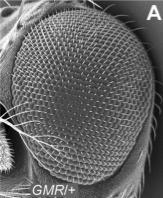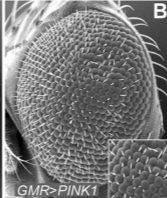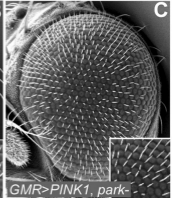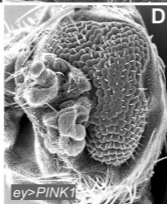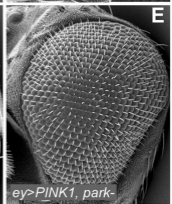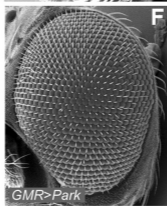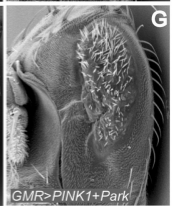

Supplement: pnas_0709336105_2.pdf [file pnas_0709336105_2.pdf]

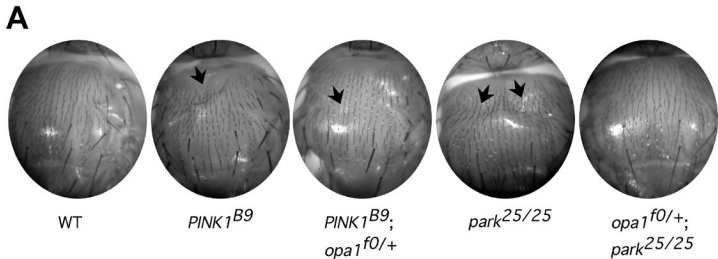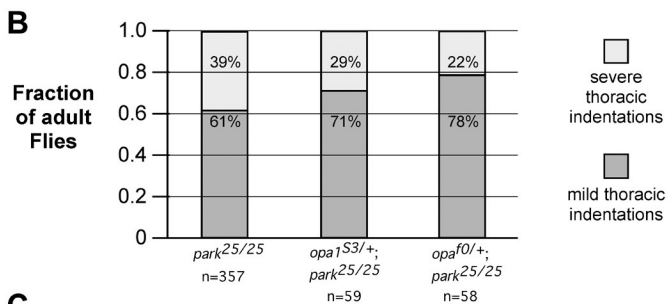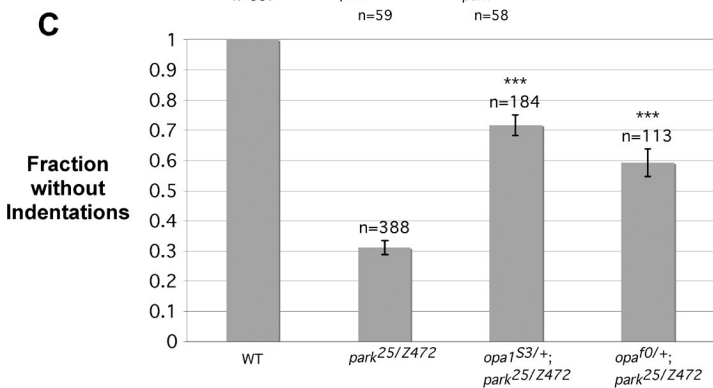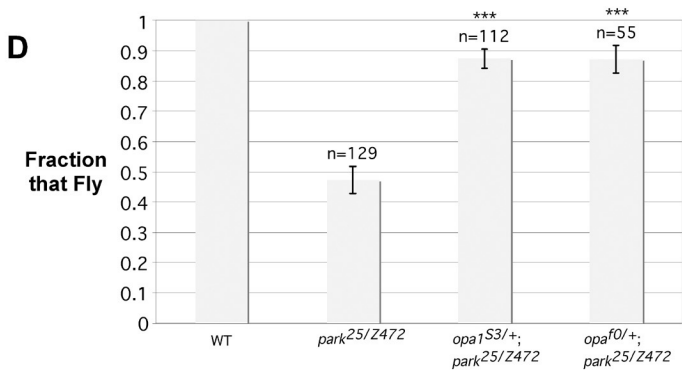

Supplement: pnas_0709336105_3.pdf [file pnas_0709336105_3.pdf]

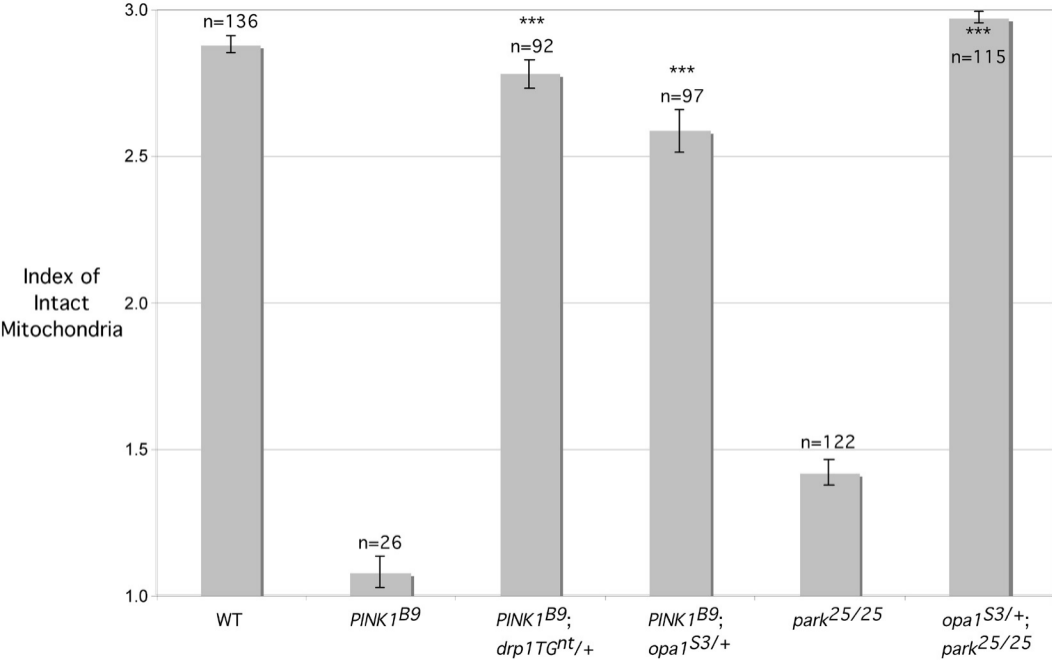

Supplement: pnas_0709336105_4.pdf [file pnas_0709336105_4.pdf]

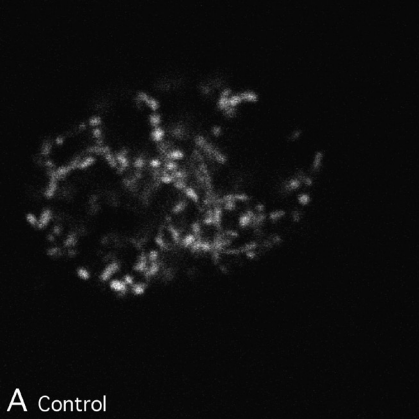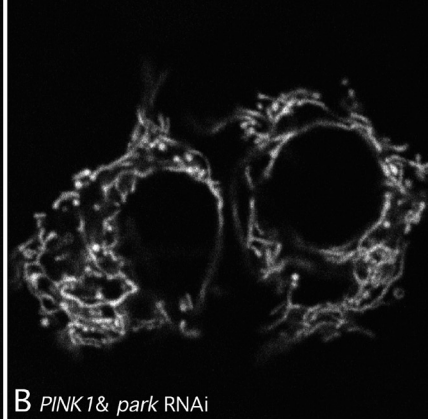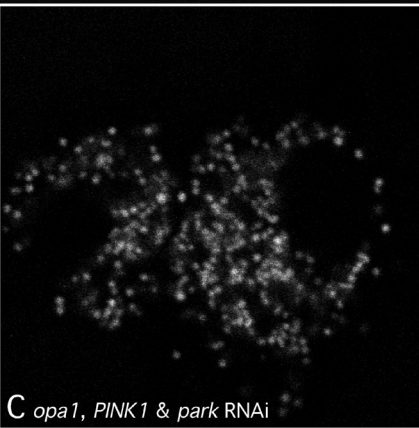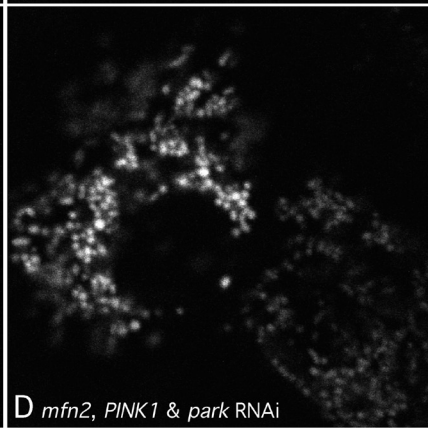

Supplement: pnas_0709336105_5.pdf [file pnas_0709336105_5.pdf]
